# Supplementary material for: Unveiling the regioselectivity in electrophilic aromatic substitution reactions of deactivated benzenes through molecular electron density theory
Source: Royal Society of Chemistry journal article supplement (doi:10.1039/d1nj02435c), 2021-01-01
Supplement: d1nj02435c1.pdf [file d1nj02435c1.pdf]

## Electronic Supplementary Information

### Unveiling the Regioselectivity in Electrophilic Aromatic Substitution Reactions of Deactivated Benzenes through Molecular Electron Density Theory

Luis R. Domingo,<sup>1\*</sup> Mar Ríos-Gutiérrez,<sup>1</sup> and María José Aurell<sup>1</sup>

<sup>1</sup> Department of Organic Chemistry, University of Valencia, Dr. Moliner 50,  
Burjassot, 46100 Valencia, Spain

#### Index

- S2** **Figure S1.** Plot of the GEDT vs the distance between nitronium NO<sub>2</sub><sup>+</sup> ion **4** and the aromatic ring at the TSs involved in the nitration of benzene **1** and benzenesulfonic acid **8**.
- S3** **Figure S2.**  $\omega$ B97X-D/6-311G(d,p) ELF basin attractor positions, together with the valence basin populations of protonated aniline.
- S4** **Table S1.**  $\omega$ B97X-D/6-311G(d,p) electronic chemical potential,  $\mu$ , chemical hardness,  $\eta$ , electrophilicity,  $\omega$ , and nucleophilicity,  $N$ , of benzene **1**, benzenesulfonic acid **8**, and nitronium NO<sub>2</sub><sup>+</sup> ion **4**
- S5** **Table S2.**  $\omega$ B97X-D/6-311G(d,p) electronic energies, enthalpies, entropies and Gibbs free energies, computed at 25 °C, 1 atm and  $\epsilon = 20.0$ , for the stationary points involved in the EAS nitration reaction of benzene **1** with nitronium NO<sub>2</sub><sup>+</sup> ion **4**.
- S6** **Table S3.**  $\omega$ B97X-D/6-311G(d,p) electronic energies, enthalpies, entropies and Gibbs free energies, computed at 25 °C, 1 atm and  $\epsilon = 20.0$ , for the stationary points involved in the EAS nitration reaction of benzenesulfonic acid **8** with nitronium NO<sub>2</sub><sup>+</sup> ion **4**.
- S6** **Table S4.**  $\omega$ B97X-D/6-311G(d,p) total and relative electronic energies, enthalpies, entropies and Gibbs free energies, computed at 25 °C, 1 atm and  $\epsilon = 40.0$ , for the **TS-0**, **TS-m** and **TS-p**.
- S7** **Table S5.** ELF valence basin populations, distances of the N7-C5 forming bond, relative electronic energies, GEDT and IRC values of the structures of the IRC associated to electrophilic attack of nitronium NO<sub>2</sub><sup>+</sup> ion **4** on benzenesulfonic acid **8**, defining the eights phases of the BET.

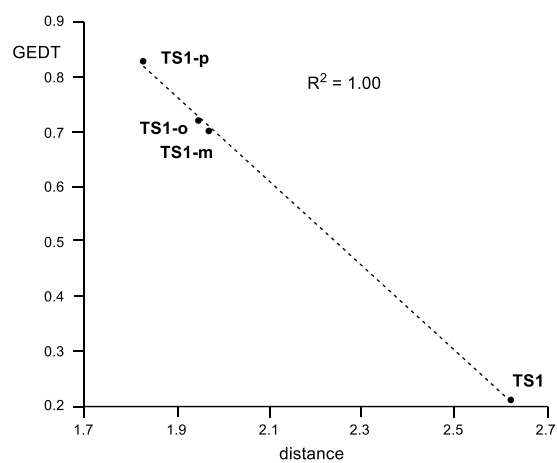

**Figure S1.** Plot of the GEDT, in average number of electrons,  $e$ , vs the distance. In Angstroms, between nitronium  $\text{NO}_2^+$  ion **4** and the aromatic ring at the TSs involved in the nitration of benzene **1** and benzenesulfonic acid **8**.

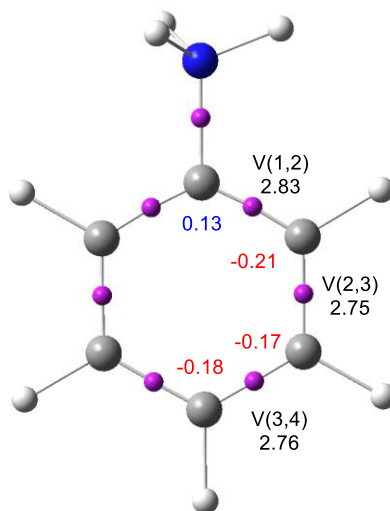

**Figure S2.**  $\omega$ B97X-D/6-311G(d,p) ELF basin attractor positions, together with the valence basin populations of protonated aniline. Negative charges are coloured in red and positive charges in blue. ELF valence basin populations and natural atomic charges are given in average number of electrons, e.

**Table S1.**  $\omega$ B97X-D/6-311G(d,p) electronic chemical potential,  $\mu$ , chemical hardness,  $\eta$ , electrophilicity,  $\omega$ , and nucleophilicity,  $N$ , in eV, of benzene **1**, benzenesulfonic acid **8**, and nitronium  $\text{NO}_2^+$  ion **4**.

|                                        | $\mu$  | $\eta$ | $\omega$ | $N$    |
|----------------------------------------|--------|--------|----------|--------|
| nitronium $\text{NO}_2^+$ ion <b>4</b> | -16.05 | 14.11  | 9.12     | -11.71 |
| benzenesulfonic acid <b>8</b>          | -4.78  | 10.18  | 1.12     | 1.53   |
| benzene <b>1</b>                       | -3.66  | 10.71  | 0.62     | 2.38   |

**Table S2.**  $\omega$ B97X-D/6-311G(d,p) electronic energies (E, in a.u.), enthalpies (H, in a.u.), entropies (S, in cal/mol.K) and Gibbs free energies (G, in a.u.), computed at 25 °C, 1 atm and  $\epsilon = 20.0$ , for the stationary points involved in the EAS nitration reaction of benzene **1** with nitronium  $\text{NO}_2^+$  ion **4**.

|                         | E           | H           | S     | G           |
|-------------------------|-------------|-------------|-------|-------------|
| <b>1</b>                | -232.221871 | -232.115478 | 68.91 | -232.148220 |
| <b>4</b>                | -204.816054 | -204.800201 | 50.97 | -204.824418 |
| $\text{H}_2\text{SO}_4$ | -700.230264 | -700.184899 | 72.06 | -700.219138 |
| $\text{HSO}_4^-$        | -699.795161 | -699.763184 | 68.97 | -699.795952 |
| <b>MC</b>               | -437.043726 | -436.920092 | 91.86 | -436.963740 |
| <b>TS</b>               | -437.041944 | -436.920104 | 89.10 | -436.962479 |
| <b>IN</b>               | -437.063157 | -436.940566 | 85.84 | -436.981353 |
| <b>3</b>                | -436.716048 | -436.604334 | 84.01 | -436.644250 |

**Table S3.**  $\omega$ B97X-D/6-311G(d,p) electronic energies (E, in a.u.), enthalpies (H, in a.u.), entropies (S, in cal/mol.K) and Gibbs free energies (G, in a.u.), computed at 25 °C, 1 atm and  $\epsilon = 20.0$ , for the stationary points involved in the EAS nitration reaction of benzenesulfonic acid **8** with nitronium  $\text{NO}_2^+$  ion **4**.

|             | E            | H            | S      | G            |
|-------------|--------------|--------------|--------|--------------|
| <b>8</b>    | -856.030728  | -855.905070  | 92.72  | -855.949126  |
| <b>4</b>    | -204.816054  | -204.800201  | 50.97  | -204.824418  |
| <b>CM-m</b> | -1060.848966 | -1060.705960 | 120.49 | -1060.763207 |
| <b>TS-o</b> | -1060.837645 | -1060.696748 | 106.75 | -1060.747467 |
| <b>TS-m</b> | -1060.838303 | -1060.697491 | 107.54 | -1060.748587 |
| <b>TS-p</b> | -1060.833897 | -1060.693126 | 107.81 | -1060.744347 |
| <b>IN-o</b> | -1060.840672 | -1060.698858 | 107.56 | -1060.749962 |
| <b>IN-m</b> | -1060.849280 | -1060.707488 | 109.50 | -1060.759517 |
| <b>IN-p</b> | -1060.845238 | -1060.704057 | 106.83 | -1060.754814 |
| <b>9</b>    | -1060.513122 | -1060.382015 | 102.16 | -1060.430556 |
| <b>10</b>   | -1060.518656 | -1060.387861 | 107.30 | -1060.438844 |
| <b>11</b>   | -1060.518301 | -1060.387610 | 107.77 | -1060.438815 |

**Table S4.**  $\omega$ B97X-D/6-311G(d,p) total and relative electronic energies (E, in a.u.,  $\Delta E$  in kcal/mol), enthalpies (H, in a.u.  $\Delta H$  in kcal/mol), entropies (S, in cal/mol.K,  $\Delta S$ , in cal/mol.K) and Gibbs free energies (G, in a.u.,  $\Delta G$  in kcal/mol), computed at 25 °C, 1 atm and  $\epsilon = 40.0$ , for the **TS-o**, **TS-m** and **TS-p**.

|             | E            | $\Delta E$ | H            | $\Delta H$ | S      | $\Delta S$ | G            | $\Delta G$ |
|-------------|--------------|------------|--------------|------------|--------|------------|--------------|------------|
| <b>8</b>    | -856.031329  |            | -855.905668  |            | 92.61  |            | -855.949668  |            |
| <b>4</b>    | -204.818956  |            | -204.803121  |            | 50.98  |            | -204.827344  |            |
| <b>TS-o</b> | -1060.840207 | 6.32       | -1060.699378 | 5.91       | 107.24 | -36.35     | -1060.750333 | 16.74      |
| <b>TS-m</b> | -1060.841023 | 5.81       | -1060.700274 | 5.34       | 107.96 | -35.63     | -1060.751570 | 15.97      |
| <b>TS-p</b> | -1060.836610 | 8.58       | -1060.695825 | 8.14       | 107.95 | -35.64     | -1060.747116 | 18.76      |

**Table S5.** ELF valence basin populations, distances of the N7-C5 forming bond, relative<sup>a</sup> electronic energies, GEDT and IRC values of the structures of the IRC associated to electrophilic attack of nitronium NO<sub>2</sub><sup>+</sup> ion **4** on benzenesulfonic acid **8**, defining the eights phases of the BET. Distances are given in angstroms, Å, GEDT values and electron populations in average number of electrons, e, relative energies in kcal·mol<sup>-1</sup>.

| tures    | <b>S1</b> | <b>S2</b> | <b>S3</b>  | <b>S4</b> | <b>TS-m</b> | <b>S5</b> | <b>S6</b> | <b>S7</b>  | <b>S8</b>   | <b>S9</b> |
|----------|-----------|-----------|------------|-----------|-------------|-----------|-----------|------------|-------------|-----------|
| Phases   | <i>I</i>  | <i>II</i> | <i>III</i> | <i>IV</i> |             | <i>V</i>  | <i>VI</i> | <i>VII</i> | <i>VIII</i> |           |
| DE       | 0.0       | 2.4       | 3.4        | 6.7       | 6.8         | 6.8       | 5.6       | 5.6        | 0.1         | -0.4      |
| GEDT     | 0         | -0.03     | -0.07      | -0.57     | -0.77       | -0.79     | -1.03     | -1.03      | -1.11       | -1.10     |
| d(N7-C5) | 3.166     | 2.689     | 2.594      | 2.081     | 1.888       | 1.874     | 1.622     | 1.620      | 1.530       | 1.533     |
| V(C1,C2) | 2.80      | 2.82      | 2.84       | 2.97      | 3.03        | 3.03      | 3.09      | 3.09       | 3.08        | 3.08      |
| V(C2,C3) | 2.77      | 2.75      | 2.73       | 2.46      | 2.31        | 2.30      | 2.13      | 2.13       | 2.13        | 2.13      |
| V(C3,C4) | 2.72      | 2.72      | 2.70       | 2.46      | 2.32        | 2.30      | 2.14      | 2.14       | 2.13        | 2.14      |
| V(C4,C5) | 2.74      | 2.74      | 2.75       | 2.82      | 2.86        | 2.86      | 2.90      | 2.90       | 2.88        | 2.88      |
| V(C5,C6) | 2.74      | 2.72      | 2.71       | 2.60      | 2.55        | 2.55      | 2.49      | 2.50       | 2.52        | 2.52      |
| V(C1,C6) | 2.85      | 2.82      | 2.80       | 2.63      | 2.56        | 2.55      | 2.47      | 2.47       | 2.49        | 2.50      |
| V(N7,O8) | 2.92      | 2.97      | 2.82       | 2.02      | 1.97        | 1.94      | 1.91      | 1.89       | 2.16        | 2.09      |
| V(O8)    | 4.90      | 3.91      | 3.93       | 2.36      | 2.57        | 2.58      | 2.73      | 2.73       | 2.80        | 2.80      |
| V'(O8)   |           | 0.99      | 1.00       | 2.91      | 2.82        | 2.82      | 2.82      | 2.81       | 2.76        | 2.76      |
| V(N7)    |           |           | 0.25       | 1.73      | 1.87        |           | 0.06      | 0.23       | 0.10        | 0.20      |
| V'(N7)   |           |           |            |           |             |           |           | 0.23       |             |           |
| V(C5)    |           |           |            | 0.09      | 0.22        |           |           |            |             |           |
| V(C5,N7) |           |           |            |           |             | 2.12      | 2.24      | 1.94       | 2.12        | 2.10      |
